# Supplementary material for: Haplotype Networking of GWAS Hits for Citrulline Variation Associated with the Domestication of Watermelon
Source: MDPI journal article supplement (doi:10.3390/ijms20215392), 2019-10-29
Supplement: s1 [file Supplementary Figure 1.pdf › Supplementary Figure 1.pdf]

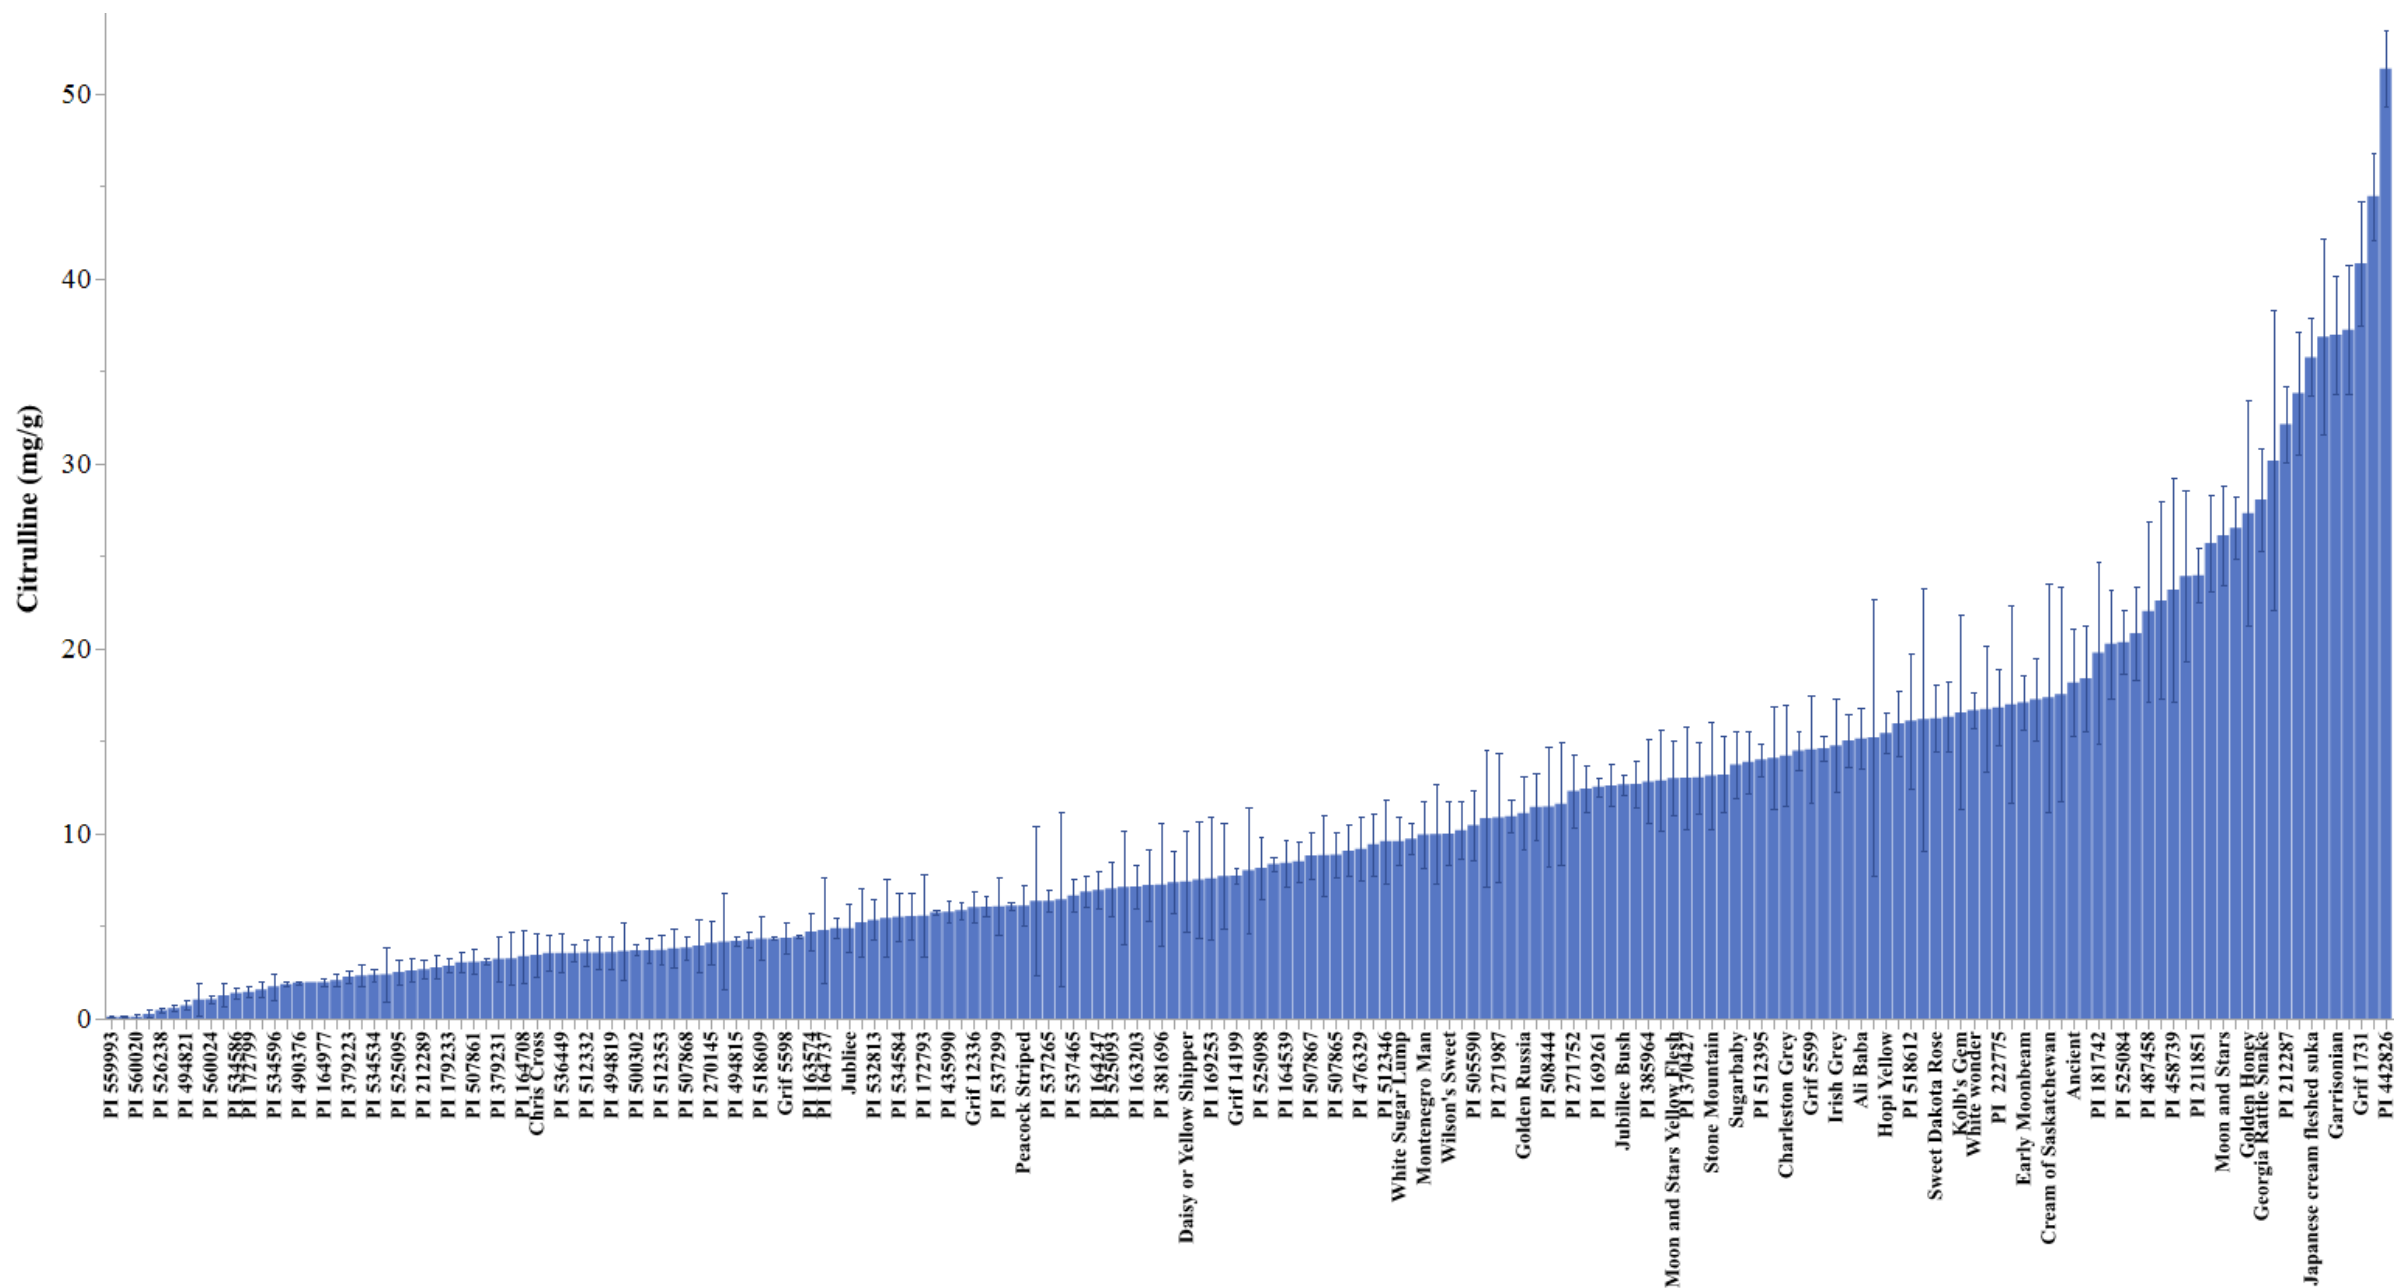

**Supplementary Figure 1.** Quantitative variation of citrulline content across watermelon accessions used in this study.
