# Supplementary material for: Haplotype Networking of GWAS Hits for Citrulline Variation Associated with the Domestication of Watermelon
Source: MDPI journal article supplement (doi:10.3390/ijms20215392), 2019-10-29
Supplement: s1 [file Supplementary Figure 2.pdf › Supplementary Figure 2.pdf]

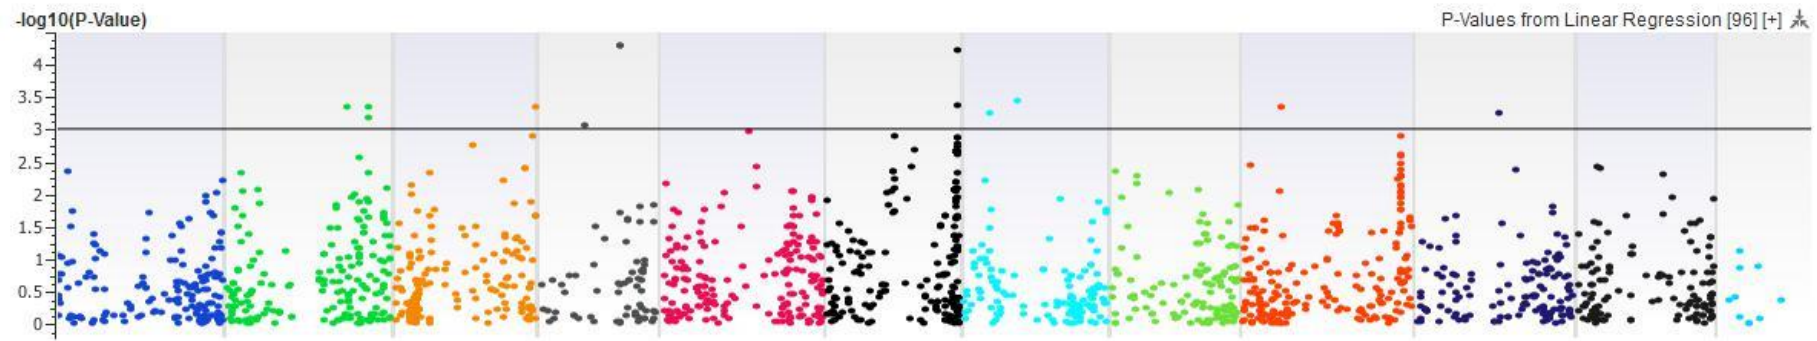

**Supplementary Figure 2.** Manhattan plot of the genome-wide association study for citrulline content in watermelon.
